# Supplementary material for: Glass transition behaviour of thin polymer films coated on the 3D networks of porous CNT sponges
Source: Royal Society of Chemistry journal article supplement (doi:10.1039/d0cp02983a), 2020-01-01
Supplement: d0cp02983a1.pdf [file d0cp02983a1.pdf]

## Glass transition of thin polymer films coated on the 3D networks of porous CNT sponges

Min Wang,<sup>a</sup> Jiapeng Zhang,<sup>a</sup> Shenglin Zhou,<sup>a</sup> Zhaohui Yang<sup>\*ab</sup> and Xiaohua Zhang<sup>\*ab</sup>

<sup>a</sup> Center for Soft Condensed Matter Physics and Interdisciplinary Research & School of Physical  
Science and Technology, Soochow University, Suzhou 215006, China  
E-mail: yangzhaohui@suda.edu.cn; zhangxiaohua@suda.edu.cn

<sup>b</sup> Jiangsu Key Laboratory of Thin Films, Soochow University, Suzhou 215006, People's Republic of  
China

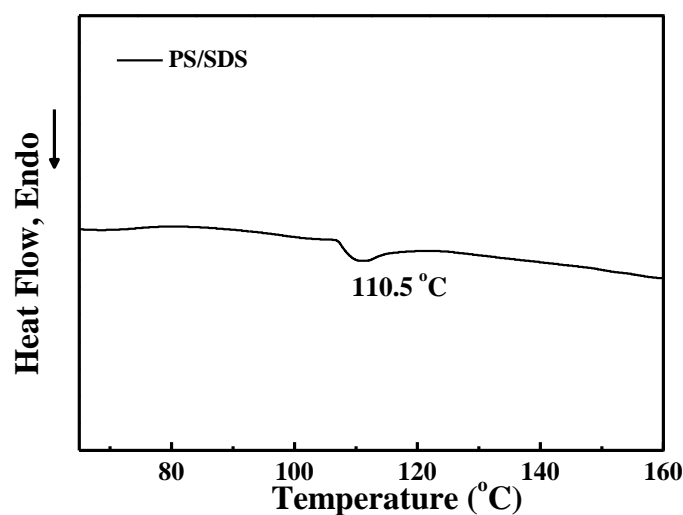

FIG S1. DSC heating curves of PS containing 1 wt% SDS without CNT sponges.
